# Supplementary material for: A cationic AIEgen and hexametaphosphate based simple and convenient fluorometric assay for alkaline phosphatase and its inhibitor
Source: Royal Society of Chemistry journal article supplement (doi:10.1039/d2ob00367h), 2022-01-01
Supplement: d2ob00367h1.pdf [file d2ob00367h1.pdf]

## Supplementary material

# A cationic AIEgen and hexametaphosphate based simple and convenient fluorometric assay for alkaline phosphatase and its inhibitor

*Jasvir Kaur,<sup>a</sup> Harshad A. Mirgane,<sup>b</sup> Sheshanath V. Bhosale<sup>b</sup> and*

*Prabhat K. Singh<sup>a,c</sup>*

<sup>a</sup>Radiation & Photochemistry Division, Bhabha Atomic Research Centre, Mumbai 400  
085, INDIA

<sup>b</sup>School of Chemical Sciences, Goa University, Taleigao Plateau, Goa 403 206, INDIA

<sup>c</sup>Homi Bhabha National Institute, Anushaktinagar, Mumbai-400085, INDIA

\*Authors for correspondence: Email: [prabhatk@barc.gov.in](mailto:prabhatk@barc.gov.in); [prabhatsingh988@gmail.com](mailto:prabhatsingh988@gmail.com)

Tel. 91-22-25590894, Fax: 91-22-25505151

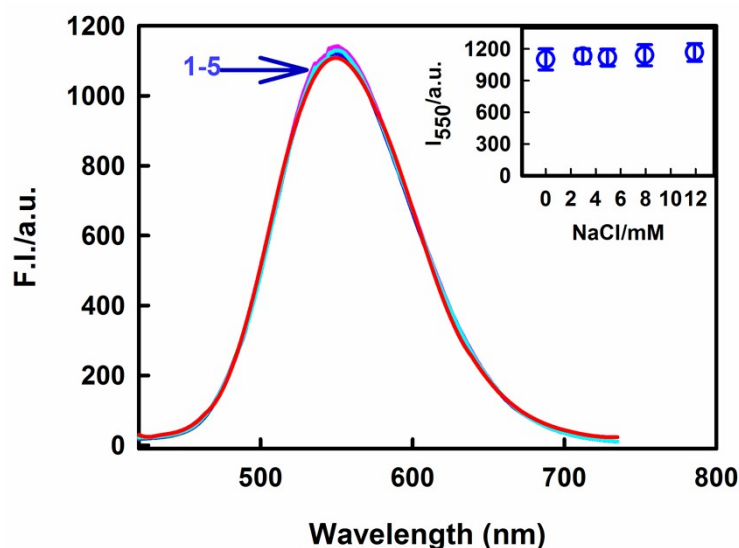

**Figure S1.** Steady-state fluorescence spectra displaying the changes in emission of TPy-TPE ([TPy-TPE]  $\sim$  2  $\mu$ M,  $\lambda_{\text{ex}}$  = 350 nm) in the presence of NaCl solutions of different concentrations [mM] (1) 0 (2) 3.0 (3) 5.0 (4) 8.0 (5) 12.0 where, red solid line denotes free TPy-TPE in solution. Inset: Variation in emission intensity at 550 nm at different NaCl concentrations. The blue circles correspond to the data points and the error bar shows the standard deviation (n=3).

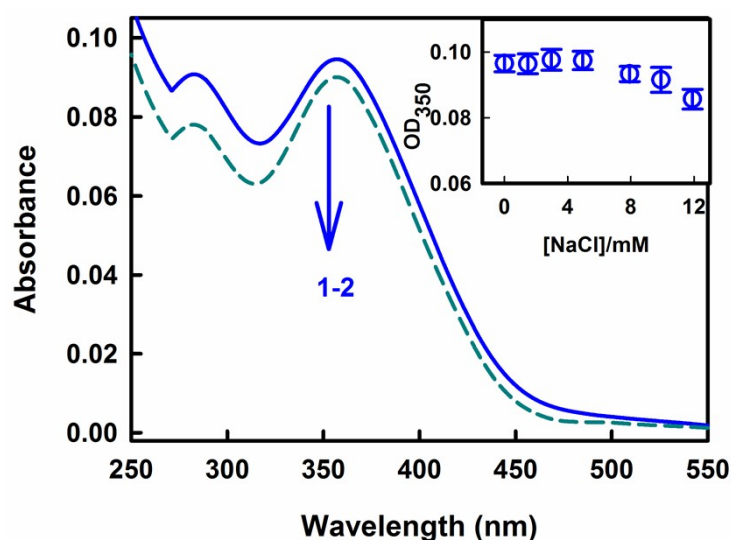

**Figure S2.** Ground-state absorption spectra displaying the changes in absorbance of TPy-TPE-HMP ([TPy-TPE]  $\sim$  2  $\mu$ M, [HMP]  $\sim$  26  $\mu$ M) in the absence and presence of [NaCl] /12

mM. Inset: Changes in absorbance at 350 nm versus NaCl concentration. The error bar represents the standard deviation value calculated from three successive measurements.

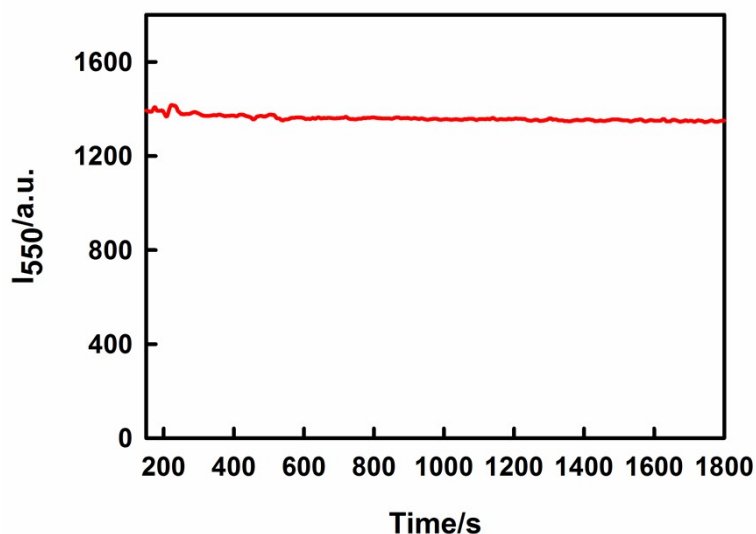

**Figure S3.** Change in fluorescence intensity of TPY-TPE-HMP complex at 30 °C as a function of incubation time.

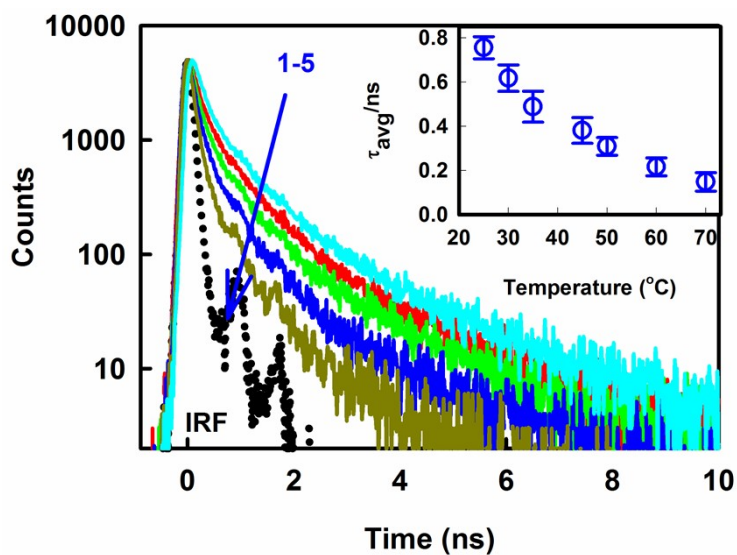

**Figure S4.** Fluorescence decay profiles for TPY-TPE-HMP complex ( $[TPY-TPE] = \sim 2 \mu\text{M}$ ,  $[HMP] = \sim 12 \mu\text{M}$ ,  $\lambda_{\text{ex}} = 374 \text{ nm}$ ,  $\lambda_{\text{em}} = 550 \text{ nm}$ ) in aqueous medium at different temperatures (°C) (1) 25 (2) 30 (3) 35 (4) 50 (5) 70 where, the black colour dotted line denotes the instrument response function (IRF). Inset: Variation in average excited state lifetime ( $\tau_{\text{avg}}$ ) of

TPy-TPE-HMP versus temperature. The error bar represents the standard deviation value calculated from three successive measurements.

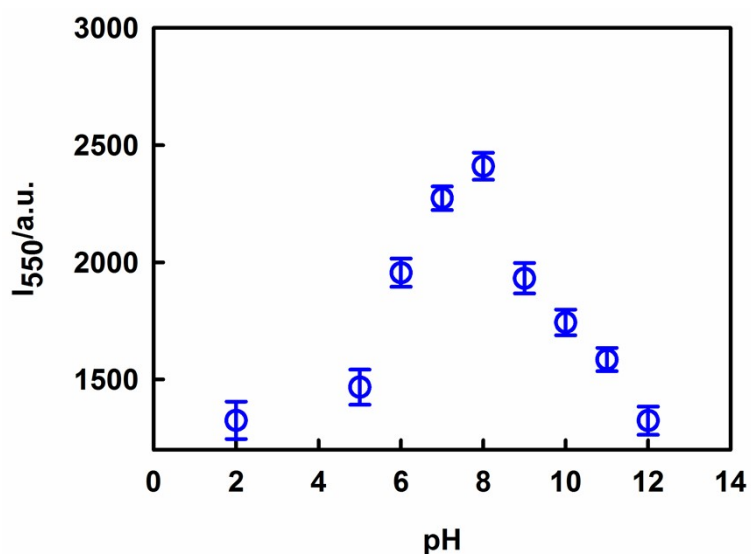

**Figure S5.** The change in emission intensities at 550 nm for TPy-TPE-HMP complex ([TPy-TPE] ~ 2  $\mu$ M, [HMP] ~26  $\mu$ M) at different solution pH values. The error bar represents the standard deviation value calculated from three successive measurements.

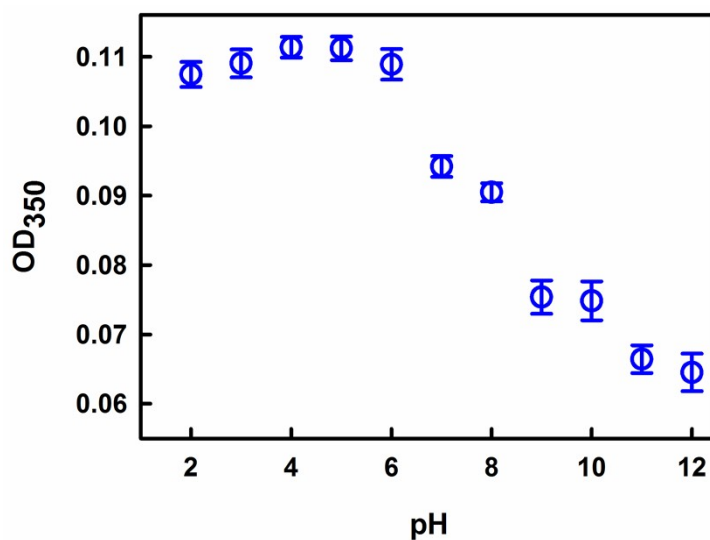

**Figure S6.** The change in absorbance at 350 nm for TPy-TPE-HMP complex ([TPy-TPE] ~ 2  $\mu$ M, [HMP] ~26  $\mu$ M) at different solution pH values. The error bar represents the standard deviation value calculated from three successive measurements.

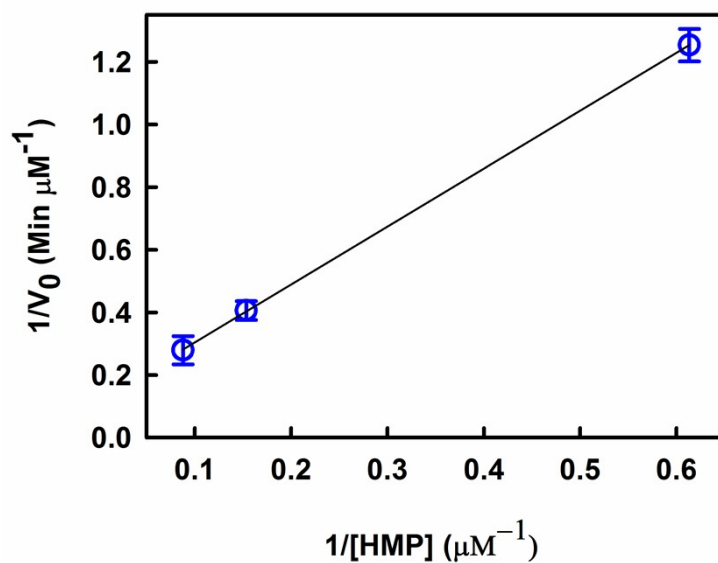

**Figure S7.** Lineweaver-Burk plot for the digestion of HMP by ALP [990 mU/mL] ( $\lambda_{\text{ex}} = 350$  nm,  $\lambda_{\text{em}} = 550$  nm) in 10 mM Tris-HCl, pH 8.2 at 30°C at different concentrations of HMP ( $\mu\text{M}$ ) (1) 1.6 (2) 6.5 (3) 11.0. The error bar represents the standard deviation value calculated from three successive measurements.

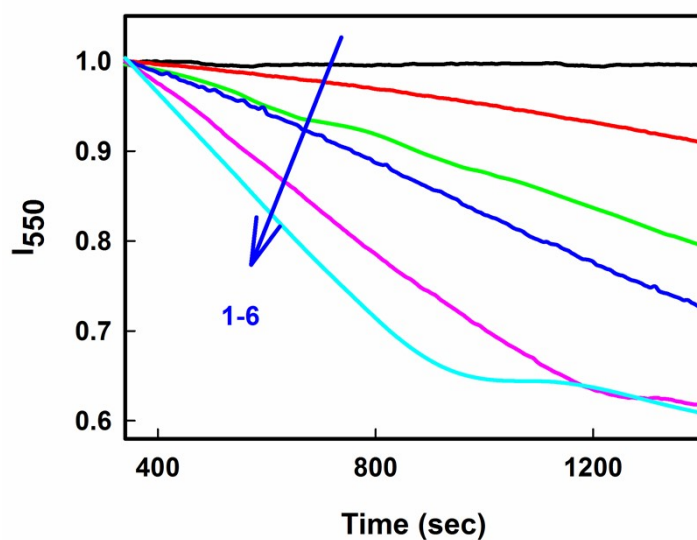

**Figure S8.** Selectivity of ALP measured as normalised fluorescence decay of the TPy TPy-TPE-HMP complex in 1% human serum prepared in 10 mM Tris-HCl, pH 8.2 at 30°C in the presence of various concentrations of ALP (mU/ml) (1) 0 (2) 495 (3) 865 (4) 1237 (5) 1484 (6) 1855.
